# Supplementary material for: Cell-free assays reveal that the HIV-1 capsid protects reverse transcripts from cGAS immune sensing
Source: PubMed Central journal article supplement (PMC11793794; doi:10.1371/journal.ppat.1012206), 2025-01-28
Supplement: ppat.1012206.s001.pdf [file ppat.1012206.s001.pdf]

**S1 Table. Reagents used in this study.**

| REAGENT                                              | Source                   | Catalogue #                         |
|------------------------------------------------------|--------------------------|-------------------------------------|
| <b>Antibodies</b>                                    |                          |                                     |
| cGAS                                                 | Cell Signaling           | Cat# 79978<br>RRID:AB_2905508       |
| STING                                                | Cell Signaling           | Cat# 13647<br>RRID:AB_2732796       |
| IRF3                                                 | Cell Signaling           | Cat# 11904<br>RRID:AB_2722521       |
| PQBP1                                                | Proteintech              | Cat# 16264-1-AP<br>RRID:AB_10792928 |
| ISG15-PE                                             | R&D Systems              | Cat# IC8044P                        |
| SIGLEC1-647                                          | BD Biosciences           | Cat# 565295<br>RRID:AB_2739163      |
| Actin                                                | BD Biosciences           | Cat# 612656<br>RRID:AB_2289199      |
| IRDye 680RD Donkey anti-Mouse fluorescent antibody   | LI-COR                   | Cat# 926-68072<br>RRID:AB_10953628  |
| IRDye 800CW Goat anti-Rabbit fluorescent antibody    | LI-COR                   | Cat# 926-32211<br>RRID:AB_621843    |
| <b>Bacterial and virus strains</b>                   |                          |                                     |
| Stbl3 competent <i>E. coli</i>                       | Thermo Fisher            | Cat# C737303                        |
| BL21-CodonPlus (DE3)-RIPL <i>E. coli</i>             | Agilent                  | Cat# 230280                         |
| BL21-CodonPlus (DE3)-RIL <i>E. coli</i>              | Agilent                  | Cat# 230245                         |
| HIV-1 SG3ΔENV                                        | NIH AIDS Reagent Program | Addgene plasmid #11051              |
| HIV-1 SG3ΔENV RT D185A                               | Christensen et al., 2020 | Addgene plasmid #145782             |
| HIV-1 SG3ΔENV CA E45A                                | Christensen et al., 2020 | Addgene plasmid #145783             |
| HIV-1 SG3ΔENV CA Q63/67A                             | Christensen et al., 2020 | Addgene plasmid #145784             |
| HIV-1 SG3ΔENV CA M66I                                | Christensen et al., 2020 | Addgene plasmid #149687             |
| HIV-1 SG3ΔENV CA Q67H/N74D                           | This study               | Addgene plasmid #217442             |
| HIV-1-GFPΔENV                                        | This study               | Addgene plasmid #217437             |
| HIV-1-GFP CA E45A                                    | This study               | Addgene plasmid #217438             |
| HIV-1-GFP CA Q63/67A                                 | This study               | Addgene plasmid #217439             |
| HIV-1-GFP CA M66I                                    | This study               | Addgene plasmid #217440             |
| HIV-1-GFP CA Q67H/N74D                               | This study               | Addgene plasmid #217441             |
| pSIV3+                                               | Mangeot et al., 2000     | N/A                                 |
| <b>Chemicals, peptides, and recombinant proteins</b> |                          |                                     |
| Melittin                                             | Sigma Aldrich            | Cat# M2272-5MG                      |
| IP6                                                  | Sigma Aldrich            | Cat# I5125-50G                      |
| rATP                                                 | Promega                  | Cat# E6011                          |
| rGTP                                                 | Promega                  | Cat# E6031                          |
| rCTP                                                 | Promega                  | Cat# E6041                          |
| rUTP                                                 | Promega                  | Cat# E6021                          |
| dATP                                                 | Promega                  | Cat# U120D                          |
| dGTP                                                 | Promega                  | Cat# U121D                          |
| dCTP                                                 | Promega                  | Cat# U122D                          |
| dTTP                                                 | Promega                  | Cat# U123D                          |

|                                                               |                              |                                 |
|---------------------------------------------------------------|------------------------------|---------------------------------|
| HEPES                                                         | Gibco                        | Cat# 15630080                   |
| Phosphate Buffer Saline (PBS)                                 | Gibco                        | Cat# 14190250                   |
| EDTA 0.5M                                                     | Invitrogen                   | Cat# AM9260G                    |
| Penicillin-Streptomycin                                       | Thermo Fisher                | Cat# 15140-122                  |
| Chloramphenicol                                               | Thermo Fisher                | Cat# B20841.22                  |
| 2-Mercaptoethanol                                             | Thermo Fisher                | Cat# 21985023                   |
| MEM non-essential amino acids                                 | Thermo Fisher                | Cat# 11140050                   |
| RPMI 1640 medium                                              | Thermo Fisher                | Cat# 11875-119                  |
| DMEM                                                          | Thermo Fisher                | Cat# 11995073                   |
| Ficoll-Paque Plus                                             | GE Healthcare                | Cat# 17-1440-02                 |
| Fetal Bovine Serum                                            | Gibco                        | (Lot #1982147)                  |
| Bovine Serum Albumin Fraction V, heat shock                   | Sigma Aldrich                | Cat# 03116956001                |
| Recombinant Human IL-4                                        | Miltenyi Biotech             | Cat# 130-093-922                |
| Recombinant Human GM-CSF                                      | Miltenyi Biotech             | Cat# 130-093-867                |
| poly-L-lysine hydrobromide                                    | MP Biomedicals               | Cat# 0219454405                 |
| Polyethylenimine "Max", (Mw 40,000) - High Potency Linear PEI | Polysciences, Inc.           | Cat# 24765-1                    |
| Paraformaldehyde                                              | Electron Microscopy Sciences | Cat# 15713-S                    |
| Polybrene                                                     | Sigma                        | Cat# TR-1003-G                  |
| Puromycin                                                     | Invivogen                    | Cat# ant-pr-1                   |
| Halt protease and phosphatase inhibitor                       | Thermo Fisher                | Cat# 78441                      |
| Efavirenz                                                     | Selleck Chemicals            | S4685                           |
| Elvitegravir                                                  | Selleck Chemicals            | S2001                           |
| Lenacapavir                                                   | MCE                          | HY-111964                       |
| GS-CA1                                                        | Gilead                       | N/A                             |
| PF-74 (PF-3450074)                                            | MCE                          | HY-120072                       |
| BOLT transfer buffer (20X)                                    | Invitrogen                   | BT00061                         |
| Novex NuPAGE MOPS SDS Running Buffer (20X)                    | Invitrogen                   | NP0001                          |
| NuPAGE LDS Sample Buffer (4X)                                 | Invitrogen                   | NP0007                          |
| Benzonase                                                     | Sigma                        | Cat# E1014                      |
| Subtilisin Protease from Bacillus                             | Sigma                        | Cat# P5380                      |
| PMSF                                                          | Roche                        | Cat# 10837091001                |
| NaCl                                                          | Thermo Fisher                | Cat# BP358-10                   |
| Tris-HCl                                                      | Thermo Fisher                | Cat# 228030051                  |
| Tris-base                                                     | Thermo Fisher                | Cat# BP152-500                  |
| MgCl <sub>2</sub>                                             | Thermo Fisher                | Cat# 41341-5000                 |
| Isopropyl β-D-1-thiogalactopyranoside                         | GoldBio                      | Cat# I2481C50                   |
| 2xYT media                                                    | Sigma                        | Cat# Y1003                      |
| Imidazole                                                     | Thermo Fisher                | Cat# AC122020020                |
| Lysozyme                                                      | GoldBio                      | Cat# L-040-100                  |
| Pepstatin                                                     | Sigma                        | Cat# 11524488001                |
| Leupeptin                                                     | Sigma                        | Cat# L2884                      |
| Aprotinin                                                     | Sigma                        | Cat# 10981532001                |
| DNase I                                                       | GoldBio                      | Cat# D-300-500                  |
| His <sub>6</sub> -ULP1 protease                               | Produced in-house            | Lao et al. 2018, J. Biol. Chem. |
| TCEP                                                          | Sigma                        | Cat# C4706                      |
| Dithiothreitol (DTT)                                          | Roche                        | Cat# 10197777001                |
| Ni-NTA resin                                                  | Qiagen                       | Cat# 30210                      |
| Casamino acids                                                | Gibco                        | Cat# 223050                     |
| cOmplete His-Tag purification beads                           | Roche                        | Cat# 5893682001                 |

|                                                             |                         |                         |
|-------------------------------------------------------------|-------------------------|-------------------------|
| EcoRI-HF Restriction Enzyme                                 | New England Biolabs     | Cat# R3101S             |
| SYBR Safe DNA Gel Stain                                     | Invitrogen              | S33102                  |
| TaqMan Fast Universal PCR Master Mix (2X)                   | Thermo Fisher           | Cat# 4352042            |
| Apex General Purpose Agarose                                | Genesee Scientific      | Cat# 20-102GP           |
| Superscript III First-Strand Synthesis System               | Thermo Fisher           | Cat# 18080051           |
| 2X Universal SYBR Green Fast qPCR Mix                       | Abclonal                | Cat# RK21203            |
| <b>Oligonucleotides</b>                                     |                         |                         |
| MSSS-FWD (early):<br>AACCCACTGCTTAAGCCTCA                   | Christensen et al.      | N/A                     |
| MSSS-REV (early):<br>ACCAGAGTCACACAACAGACG                  | Christensen et al.      | N/A                     |
| FST-FWD (intermediate):<br>AGCCGCCTAGCATTTCATCA             | Christensen et al.      | N/A                     |
| FST-REV (intermediate):<br>CCAGCGGAAAGTCCCTTGTA             | Christensen et al.      | N/A                     |
| Late RT-FWD:<br>TGTGTGCCCGTCTGTTGTGT                        | Christensen et al.      | N/A                     |
| Late RT-REV:<br>CTTCAGCAAGCCGAGTCCTG                        | Christensen et al.      | N/A                     |
| cGAS gRNA target:<br>GAGGCCGCCCTGCCTAAGGC                   | Johnson et al.          | N/A                     |
| STING gRNA target:<br>CCCCGTGACCCCTGGGACAC                  | Johnson et al.          | N/A                     |
| IRF3 gRNA target:<br>CGTGCGGCTCTTGTTACCCC                   | Johnson et al.          | N/A                     |
| PQBP1 KO1 gRNA target:<br>GTCTGCAGCGCAACGGGCAG              | This study              | N/A                     |
| PQBP1 KO2 gRNA target:<br>GGATGCCTCTCTTGCCCAAG              | This study              | N/A                     |
| FST-FWD (HIV-1-GFP, intermediate):<br>AGCCTCCTAGCATTTCGTCAC | This study              | N/A                     |
| FST-REV (HIV-1-GFP, intermediate):<br>CCAGCGGAAAGTCCCTTGTA  | This study              | N/A                     |
| TaqMan eGFP assay                                           | Thermo Fisher           | Cat# Mr04329676_mr      |
| TaqMan IFITM1 assay                                         | Thermo Fisher           | Cat# Hs00705137_s1      |
| TaqMan IFITM3 assay                                         | Thermo Fisher           | Cat# Hs03057129_s1      |
| TaqMan MX1 assay                                            | Thermo Fisher           | Cat# Hs00895608_m1      |
| TaqMan ISG15 assay                                          | Thermo Fisher           | Cat# Hs01921425_s1      |
| TaqMan IFI27 assay                                          | Thermo Fisher           | Cat# Hs01086373_g1      |
| TaqMan GAPDH assay                                          | Thermo Fisher           | Cat# Hs02786624_g1      |
| <b>Recombinant DNA</b>                                      |                         |                         |
| psPAX2                                                      | Gift from Didier Trono  | Addgene plasmid #12260  |
| pCMV-VSV-G                                                  | Gift from Bob Weinberg  | Addgene plasmid #8454   |
| pCA528                                                      | Gift from Wes Sundquist | DNASU plasmid pCA528    |
| pCA528-huPQBP1                                              | This study              | Addgene plasmid #217449 |
| lentiCRISPR v2                                              | Gift from Feng Zhang    | Addgene plasmid #52961  |
| lentiCRISPR control (LCV2) empty vector minus stuffer       | Johnson et al., 2018    | Addgene plasmid #217443 |
| lentiCRISPR cGAS                                            | Johnson et al., 2018    | Addgene plasmid #217444 |
| lentiCRISPR STING                                           | Johnson et al., 2018    | Addgene plasmid #217445 |
| lentiCRISPR IRF3                                            | Johnson et al., 2018    | Addgene plasmid #217446 |
| lentiCRISPR PQBP1 KO1                                       | This study              | Addgene plasmid #217447 |
| lentiCRISPR PQBP1 KO2                                       | This study              | Addgene plasmid #217448 |

|                                                    |                      |                                                                                                                       |
|----------------------------------------------------|----------------------|-----------------------------------------------------------------------------------------------------------------------|
|                                                    |                      |                                                                                                                       |
| <b>Software</b>                                    |                      |                                                                                                                       |
| GraphPad Prism 9.0                                 | GraphPad             | <a href="https://www.graphpad.com/scientific-software/prism/">https://www.graphpad.com/scientific-software/prism/</a> |
| FlowJo 10.0                                        | FlowJo LLC           | <a href="https://www.flowjo.com/">https://www.flowjo.com/</a>                                                         |
| Image Studio Lite 5.5                              | LI-COR               | <a href="https://www.licor.com/bio/image-studio-lite/">https://www.licor.com/bio/image-studio-lite/</a>               |
| Morpheus                                           | Broad Institute      | <a href="https://software.broadinstitute.org/morpheus/">https://software.broadinstitute.org/morpheus/</a>             |
| Illustrator                                        | Adobe                | <a href="https://www.adobe.com/products/illustrator">https://www.adobe.com/products/illustrator</a>                   |
| BioRender                                          | BioRender            | <a href="https://www.biorender.com/">https://www.biorender.com/</a>                                                   |
|                                                    |                      |                                                                                                                       |
| <b>Other Reagents</b>                              |                      |                                                                                                                       |
| LS Columns                                         | Miltenyi Biotec, Inc | 130-042-401                                                                                                           |
| CD14 MicroBeads, human                             | Miltenyi Biotec, Inc | 130-050-201                                                                                                           |
| QuadroMACS Separator                               | Miltenyi Biotec, Inc | 130-090-976                                                                                                           |
| ProFlex PCR System                                 | Thermo Fisher        | Cat# A41182                                                                                                           |
| QuantStudio 3 Real-Time PCR System                 | Applied Biosystems   | A28137                                                                                                                |
| Attune NxT Flow Cytometer                          | Thermo Fisher        | A24858                                                                                                                |
| Attune NxT Autosampler                             | Thermo Fisher        | 4473928                                                                                                               |
| Odyssey CLx Imager                                 | LI-COR               | CLX-2063                                                                                                              |
| SpectraMax ID.5 Plate Reader                       | Molecular Devices    | Cat #76175-288                                                                                                        |
| BioTek Synergy Neo2 Plate Reader                   | Agilent              | BTNEO2                                                                                                                |
| SW 32 Ti Rotor, Swinging Bucket                    | Beckman              | Cat# 369694                                                                                                           |
| 0.45µm syringe filters                             | Corning              | Cat# 28200-026                                                                                                        |
| Optima Ultracentrifuge                             | Beckman              | Model: LE-80k                                                                                                         |
| Bolt 4-12% Bis-Tris Plus Gels                      | Invitrogen           | NW04125BOX                                                                                                            |
| HiTrap Heparin HP 5 mL                             | Cytiva               | Cat# 17040701                                                                                                         |
| HiTrap Q HP 5 mL                                   | Cytiva               | Cat# 17115401                                                                                                         |
| Superdex 75, 120 mL;16/600                         | Cytiva               | Cat# 28989333                                                                                                         |
| Thinwall Polyallomer, Konical Tubes; 25 x 89 mm    | Beckman              | Cat# 358126                                                                                                           |
| Open-Top Thinwall Ultra-Clear Tube, 25 x 89 mm     | Beckman              | Cat# 344058                                                                                                           |
| 2',3'-cGAMP ELISA Kit                              | Arbor Assays         | Cat# K067-H5                                                                                                          |
| LIVE/DEAD Fixable Violet Dead Cell Stain Kit       | Molecular Probes     | L34955                                                                                                                |
| BCA protein assay, reducing agent compatible       | Thermo Fisher        | Cat# PI23252                                                                                                          |
| p24 ELISA                                          | Xpress Bio           | XB-1000                                                                                                               |
| PureLink HiPure Plasmid Maxiprep Kit               | Invitrogen           | K210007                                                                                                               |
| QIAquick PCR Purification Kit                      | Qiagen               | Cat# 28106                                                                                                            |
| Cytofix/Cytoperm Fixation/Permeabilization Kit     | BD Biosciences       | 554714                                                                                                                |
| Human leukocytes from normal donors (deidentified) | ARUP Components      | N/A                                                                                                                   |
| DNeasy Blood & Tissue Kit                          | Qiagen               | Cat# 69504                                                                                                            |
| QIAquick Gel Extraction Kit                        | Qiagen               | Cat# 28706                                                                                                            |
| RNeasy 96 Kit                                      | Qiagen               | Cat# 74181                                                                                                            |
| Owl EasyCast B1 Mini Gel Electrophoresis System    | Thermo Fisher        | Cat# B1-BP                                                                                                            |
| PowerEase Touch 250W Power Supply                  | Thermo Fisher        | Cat# PSC350M                                                                                                          |
| iBright FL1500 Imaging System                      | Thermo Fisher        | Cat# A44115                                                                                                           |
|                                                    |                      |                                                                                                                       |
