# Supplementary material for: Cell-free assays reveal that the HIV-1 capsid protects reverse transcripts from cGAS immune sensing
Source: PubMed Central journal article supplement (PMC11793794; doi:10.1371/journal.ppat.1012206), 2025-01-28
Supplement: ppat.1012206.s008.pdf [file ppat.1012206.s008.pdf]

:4(&A4\$3( )3;4\$3)\$(&2\$2',2\$(&649\$, (;\$2'4"40&"4\$3(5&"1&",23(:\$A&"4\$; ,2,\$2',2\$7&/9;\$, ; ;"4))\$&2'4"\$464(2)\$  
3(\$2'4\$4,"9.\$9304\$5.504\$)/5'\$, )\$S+\$5&A 19423& ("2"3 : :4"\$0&"\$5, 1)3; ;3, )4A89.\$7&/9;\$3A 1"&64\$2'4\$3A 1, 52\$  
&0\$2'3)\$7&"-#\$

! "#\$%&&, % - ". / #&00) 102% 31+ % 4561#7 \* 18\$0% 91: )7#1 ; %

1"&54) \*\$2 ' 4. \$; &\$ (&2\$4D19, 3 (\$3 (\$; 42, 39\$2 ' 4\$5& (59 / )3& ( )\$0"& A\$b3 :\$=E ]#5C (5"4, )3 ( : \$2 ' 4\$5& (54(2", 23& (\$&0\$



\$  
j# \$ \3 (4) \$ I f ` H I f Q X \$ 3 2 \$ 3 ) \$ ) 2 , 2 4 ; \$ 2 ' , 2 \$ ' 3 : ' \$ 9 4 ( , 5 , 1 , 6 3 " \$ 9 4 6 4 9 ) \$ e 1 " 4 ) / A , 8 9 . e \$ 3 ( ' 3 8 3 2 \$ " 4 6 4 " ) 4 \$ 2 " , ( ) 5 " 3 1 2 3 & ( \$ 3 ( \$  
+ > G H I \$ 5 4 9 9 ) # \$ + ' 3 ) \$ 5 , ( \$ 8 4 \$ 4 , ) 3 9 . \$ 2 4 ) 2 4 ; \$ 8 . \$ a S + H

, A&/ (2&0\$2 '4\$; "/:J&64"-3990#\$\$+ ' /) \*\$2 '3)\$; , 2, \$3)\$ (&2\$3 (\$, : "44A4(2\$732 ' \$1"463&/)S03 (; 3 (: )#\$+ ' 4\$9324", 2/"4\$ ) '&/9; \$84\$5& ( )3; 4"4; \*\$, )2 7&\$)41, ", 24\$1, 14")\$/3 (: \$2 '4\$0, 24&0\$2 '4\$5, 1)3; \$, ) , . \$) '&74; \$)2, 8393B, 23& (\$

M/#5 " '\$+ ' ")#&;+- "9# . "#0 " "3#%&.\$4+, "#H/\$&;\*3\$<1#/#' +\$#% "#, "3" -&' \$#6,+6", \$<#%&\$#6", \$&\* ' /#\$+#\$%\*/#



61;3\*4&\$\*' / #



; , 2, \$2', 2\$7&/9; \$4(' , (54\$59, "32.#\$  
\$\$

S463474"\$WIX\$+ '4\$23294\$0&"\$2 '3)\$7&"-\$A4(23&())\$, (\$,9"4, ; .-\$4D3)23(:\$, (;\$, : "44;
