# Supplementary material for: Cell-free assays reveal that the HIV-1 capsid protects reverse transcripts from cGAS immune sensing
Source: PubMed Central journal article supplement (PMC11793794; doi:10.1371/journal.ppat.1012206), 2025-01-28
Supplement: ppat.1012206.s009.pdf [file ppat.1012206.s009.pdf]

! "#\$%&'()\*+,-./:;<=>?@A
